# Supplementary material for: Ayurveda in Knee Osteoarthritis—Secondary Analyses of a Randomized Controlled Trial
Source: MDPI journal article supplement (doi:10.3390/jcm11113047), 2022-05-28
Supplement: s1 [file s1]

## Supplementary Materials S1

Table S1: Baseline characteristics

| Characteristic                                  |                             | All patients | Ayurveda     | Conventional |
|-------------------------------------------------|-----------------------------|--------------|--------------|--------------|
|                                                 |                             | (n=151)      | (n=77)       | (n=74)       |
| Mean age (SD), y                                |                             | 61.2 (6.6)   | 60.9 (6.5)   | 61.5 (6.6)   |
| Mean Body mass index (SD), kg/m <sup>2</sup>    |                             | 26.1 (3.9)   | 25.8 (3.7)   | 26.4 (4.2)   |
| > 10 years of school, n (%)                     |                             | 81 (54.4)    | 42 (56.0)    | 39 (52.7)    |
| Mean duration of knee pain (SD), y              |                             | 9.4 (8.1)    | 9.7 (9.1)    | 9.0 (7.0)    |
| Patients with concomitant diagnoses (CD), n (%) |                             | 140 (92.7)   | 71 (92.2)    | 69 (93.2)    |
|                                                 | Mean number of CD (SD)      | 4.3 (2.5)    | 4.4 (2.6)    | 4.1 (2.4)    |
|                                                 | Patients with 1-2 CD, n (%) | 27 (17.9)    | 13 (16.9)    | 14 (18.9)    |
|                                                 | Patients with 3-4 CD, n (%) | 48 (31.8)    | 22 (28.6)    | 26 (35.1)    |
|                                                 | Patients with ≥ 5 CD, n (%) | 65 (43.0)    | 36 (46.8)    | 29 (39.2)    |
| Medication intake for knee OA                   |                             | 73 (48.3)    | 34 (44.2)    | 39 (52.7)    |
| Mean systolic blood pressure (SD), mmHg         |                             | 139.4 (16.8) | 137.3 (16.1) | 141.5 (17.3) |
| Mean diastolic blood pressure (SD), mmHg        |                             | 85.6 (9.4)   | 84.1 (9.6)   | 87.1 (9.1)   |
| Mean VAS score for knee pain (SD), mm           |                             | 57.7 (11.7)  | 56.9 (11.7)  | 58.6 (11.7)  |
| WOMAC, mean (SD)                                |                             |              |              |              |
|                                                 | Global scale                | 92.6 (42.2)  | 91.1 (40.3)  | 94.2 (44.4)  |
|                                                 | Pain subscale               | 19.3 (8.5)   | 19.0 (8.1)   | 19.6 (9.0)   |
|                                                 | Stiffness subscale          | 9.9 (4.7)    | 9.8 (4.7)    | 10.1 (4.7)   |
|                                                 | Function subscale           | 63.4 (31.8)  | 62.3 (30.6)  | 64.5 (33.1)  |
| PDI, mean (SD)                                  |                             | 23.8 (11.4)  | 22.6 (10.6)  | 25.1 (12.1)  |
| PDI, mean (SD)                                  |                             | 23.8 (11.4)  | 22.6 (10.6)  | 25.1 (12.1)  |
| SES, mean (SD)                                  |                             |              |              |              |
|                                                 | Affective                   | 27.1 (8.2)   | 27.3 (8.8)   | 26.9 (7.6)   |
|                                                 | Sensory                     | 18.2 (5.7)   | 18.3 (5.6)   | 18.1 (5.8)   |
| POMS, mean (SD)                                 |                             |              |              |              |
|                                                 | Depression factor           | 1.5 (0.9)    | 1.5 (1.0)    | 1.4 (0.9)    |
|                                                 | Fatigue factor              | 1.8 (0.9)    | 1.8 (0.9)    | 1.8 (0.9)    |
|                                                 | Vigor factor                | 2.0 (0.7)    | 2.0 (0.6)    | 2.0 (0.7)    |
|                                                 | Anger factor                | 1.7 (0.9)    | 1.8 (0.9)    | 1.7 (0.8)    |
| SF-36, mean (SD)                                |                             |              |              |              |
|                                                 | Physical component summary  | 33.2 (7.7)   | 33.4 (7.4)   | 33.0 (8.1)   |
|                                                 | Mental component summary    | 51.3 (11.3)  | 50.4 (12.1)  | 52.3 (10.5)  |
| NRS (11-point 0-10), mean (SD)                  |                             |              |              |              |
|                                                 | Pain at rest                | 3.4 (2.3)    | 3.4 (2.3)    | 3.4 (2.3)    |
|                                                 | Pain during movement        | 5.6 (1.9)    | 5.4 (2.0)    | 5.9 (1.7)    |

|                                                  |                                      |            |           |           |
|--------------------------------------------------|--------------------------------------|------------|-----------|-----------|
|                                                  | Everyday bothersomeness through pain | 5.3 (2.0)  | 5.1 (2.1) | 5.6 (1.9) |
|                                                  | Sleep quality                        | 5.6 (2.5)  | 5.2 (2.5) | 6.0 (2.5) |
| Likert scales (7-point, 0-6), mean (SD)          |                                      |            |           |           |
| Patient's expectations of Ayurveda therapy       |                                      |            |           |           |
|                                                  | Reduction of OA complaints           | 4.8 (1.1)  | 4.8 (1.1) | 4.8 (1.0) |
|                                                  | Overall effectiveness                | 4.7 (1.2)  | 4.6 (1.2) | 4.9 (1.1) |
|                                                  | Comprehensibility                    | 4.6 (1.3)  | 4.6 (1.3) | 4.6 (1.3) |
| Patient's expectations of conventional therapy   |                                      |            |           |           |
|                                                  | Reduction of OA complaints           | 3.8 (1.3)  | 3.7 (1.3) | 3.9 (1.4) |
|                                                  | Overall effectiveness                | 3.7 (1.2)  | 3.4 (1.1) | 4.0 (1.2) |
|                                                  | Comprehensibility                    | 4.1 (1.4)  | 4.0 (1.3) | 4.2 (1.4) |
| Physician's expectations of Ayurveda therapy     |                                      |            |           |           |
|                                                  | Reduction of OA complaints           | 5.0 (1.0)  | 5.1 (1.0) | 5.0 (1.0) |
|                                                  | Overall effectiveness                | 4.5 (0.9)  | 4.5 (1.0) | 4.5 (0.9) |
|                                                  | Comprehensibility                    | 4.7 (1.1)  | 4.7 (1.1) | 4.7 (1.0) |
| Physician's expectations of conventional therapy |                                      |            |           |           |
|                                                  | Reduction of OA complaints           | 3.5 (0.9)  | 3.4 (1.0) | 3.5 (0.8) |
|                                                  | Overall effectiveness                | 3.0 (0.9)  | 3.0 (0.9) | 3.0 (0.8) |
|                                                  | Comprehensibility                    | 3.8 (1.1)  | 3.7 (1.1) | 3.8 (1.1) |
| Study center, n (%)                              |                                      |            |           |           |
| Study center 1                                   |                                      | 121 (80,1) | 61 (40,4) | 60 (39,7) |
| Study center 2                                   |                                      | 30 (19,9)  | 16 (10,6) | 14 (9,3)  |

Table S2: Classification of patients with “clinical improvement” (C5.0 model)

**Rule 1:**

Therapy = Ayurveda  
WOMAC-C baseline > 6  
→ Clinical improvement

Rule 2: Therapy = Conventional  
WOMAC-B stiffness baseline > 10  
→ Clinical improvement

**Rule 3:**

Therapy = Ayurveda  
WOMAC-C baseline ≤ 6  
→ Clinical improvement

**Rule 4:**

Therapy = Conventional  
WOMAC-B stiffness baseline ≤ 10  
Gender = Male  
→ No improvement or worsening

**Rule 5:**

Therapy = Conventional therapy  
WOMAC-B stiffness baseline ≤ 10  
Gender = Female  
Patients' expectations of the therapy received= medium to high  
WOMAC-A pain baseline ≤ 11  
→ Clinical improvement

**Rule 6:**

Therapy = Conventional therapy  
WOMAC-B stiffness baseline ≤ 10

Gender = Female

Patients' expectations of the therapy received= medium to high  
WOMAC-A pain baseline > 11  
→ No clinical improvement or worsening

**Rule 7:**

Therapy = Conventional therapy  
WOMAC-B stiffness baseline ≤ 10  
Gender = Female  
Patients' expectations of the therapy received= low  
duration of knee pain (years) > 24  
→ No clinical improvement or worsening

**Rule 8:**

Therapy = Conventional therapy  
WOMAC-B stiffness baseline ≤ 10  
Gender = Female  
Patients' expectations of the therapy received= low  
duration of knee pain (years) ≤ 24  
WOMAC-B stiffness baseline > 2  
→ Clinical improvement

**Rule 9:**

Therapy = Conventional therapy  
WOMAC-B stiffness baseline ≤ 10  
Gender = Female  
Patients' expectations of the therapy received= low  
duration of knee pain (years) ≤ 24  
WOMAC-B stiffness baseline ≤ 2  
→ No clinical improvement or worsening  
Default class: Clinical improvement

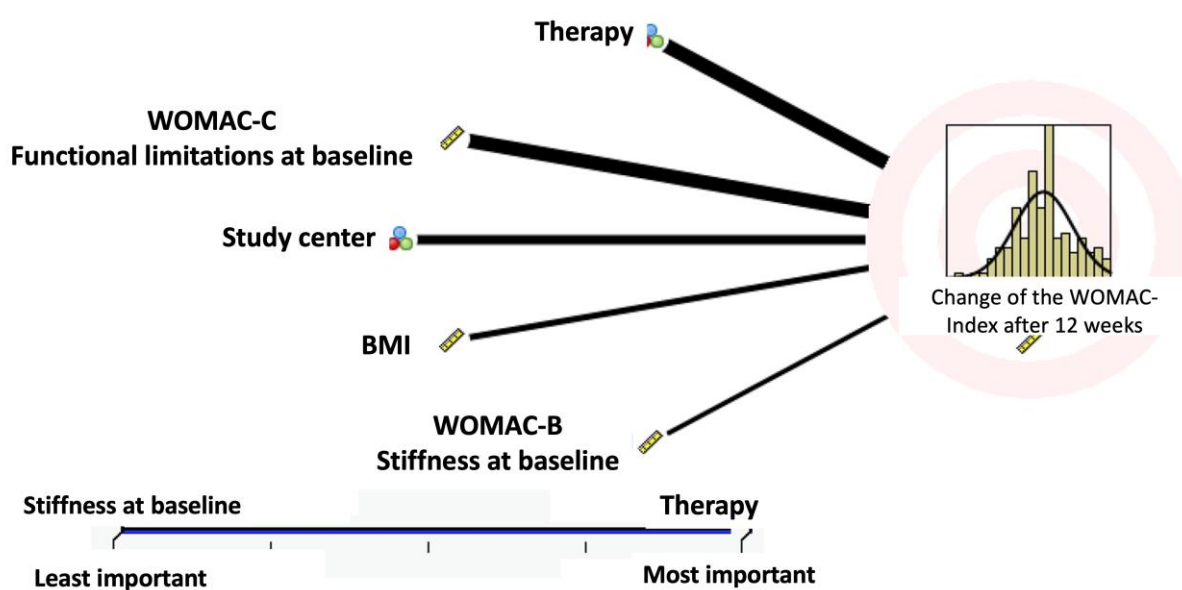

Figure S1: Effect changes of the WOMAC-Index from baseline to 12 weeks. Therapy and functional limitations are the most important predictors for the outcome in a regression model.

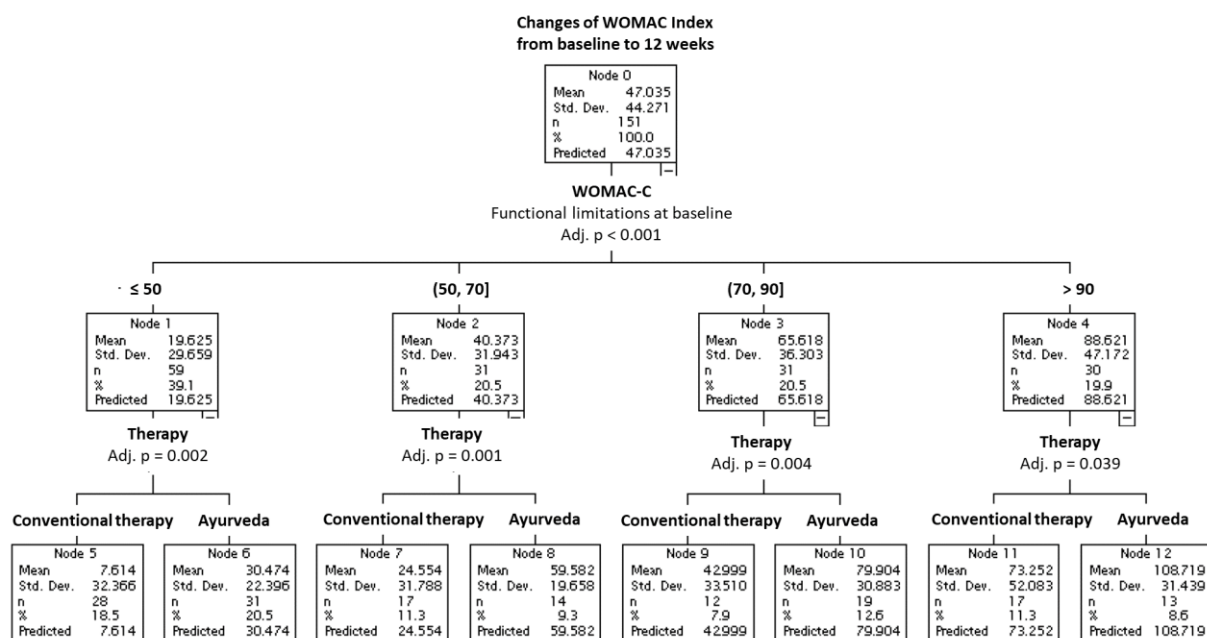

Figure S2: Exhausted CHAID model for changes of WOMAC-Index from baseline to 12 weeks including the factors therapy and WOMAC subscale functional limitations at baseline.
